# Supplementary material
Source: publisher figshare collection journal article supplement (https://tandf.figshare.com/ndownloader/files/35113763)
Supplement: Supplementary file 3 [file 35113763]

Archive with 12 entries (9 files):
- Supplements/
- Supplements/.DS_Store
- __MACOSX/
- __MACOSX/Supplements/
- __MACOSX/Supplements/._.DS_Store
- Supplements/JASA-ACS-2021-0085Suppl.pdf
- __MACOSX/Supplements/._JASA-ACS-2021-0085Suppl.pdf
- Supplements/README.md
- __MACOSX/Supplements/._README.md
- Supplements/acc_form.pdf
- __MACOSX/Supplements/._acc_form.pdf
- Supplements/MPHIA_code.zip
