# Supplementary material
Source: publisher figshare collection journal article supplement (https://tandf.figshare.com/ndownloader/files/35113763)
Supplement: Supplementary file 3 [file 35113763 › Supplements/README.md]

The online supplements contain the acc form, the code to reproduce the results in the paper, and one pdf file which contains the technical proofs, some additional details for the six Tri90 datasets, also some additional numerical results, a summary for the notations in the proposed algorithms, and parts of MPHIA Codebook.
